# Supplementary material
Source: Springer Nature journal article supplement (https://www.springermedizin.de/resource/supplementary/12875_2014_1066_MOESM6_ESM.pdf/9436074)
Supplement: MOESM6 [file 9436074]

**Table 2.** Measurements and time points

| <b>Concept<br/>(questionnaires)</b>                                                                                                                      | <b>Intervention groups</b> |    |    | <b>Control group</b> |    |    |
|----------------------------------------------------------------------------------------------------------------------------------------------------------|----------------------------|----|----|----------------------|----|----|
|                                                                                                                                                          | t0                         | t1 | t2 | t0                   | t1 | t2 |
| Demographic variables                                                                                                                                    | x                          |    |    | x                    |    |    |
| Physical activity<br>(PAM)                                                                                                                               | x                          | x  | x  | x                    | x  | x  |
| Quality of life<br>(SF 36)                                                                                                                               | x                          | x  | x  | x                    | x  | x  |
| General Self-Efficacy<br>(GSS)                                                                                                                           | x                          | x  | x  | x                    | x  | x  |
| Exercise Self-Efficacy<br>(ESS)                                                                                                                          | x                          | x  | x  | x                    | x  | x  |
| Health status<br>(DSC-R or CRQ-SAS)                                                                                                                      | x                          | x  | x  | x                    | x  | x  |
| Process evaluation                                                                                                                                       |                            | x  |    |                      |    |    |
| PAM: Personal Activity Monitor<br>DSC-R: Diabetes Symptom Checklist-revised<br>CRQ-SAS: Chronic Respiratory Questionnaire-Self-Administered Standardised |                            |    |    |                      |    |    |
| T0 - baseline<br>T1 - after 4-6 months (end of intervention)<br>T2 - after 9 months (post intervention)                                                  |                            |    |    |                      |    |    |
